# Supplementary material for: The Cdc42 GAP Rga6 promotes monopolar outgrowth of spores
Source: PubMed Central journal article supplement — J Cell Biol. 2022 Nov 10;222(1):e202202064. doi: 10.1083/jcb.202202064 (PMC9652770; doi:10.1083/jcb.202202064), 2022-11-10
Supplement: JCB_202202064_SourceDataF3.pdf [file JCB_202202064_SourceDataF3.pdf]

## SourceDataF3A

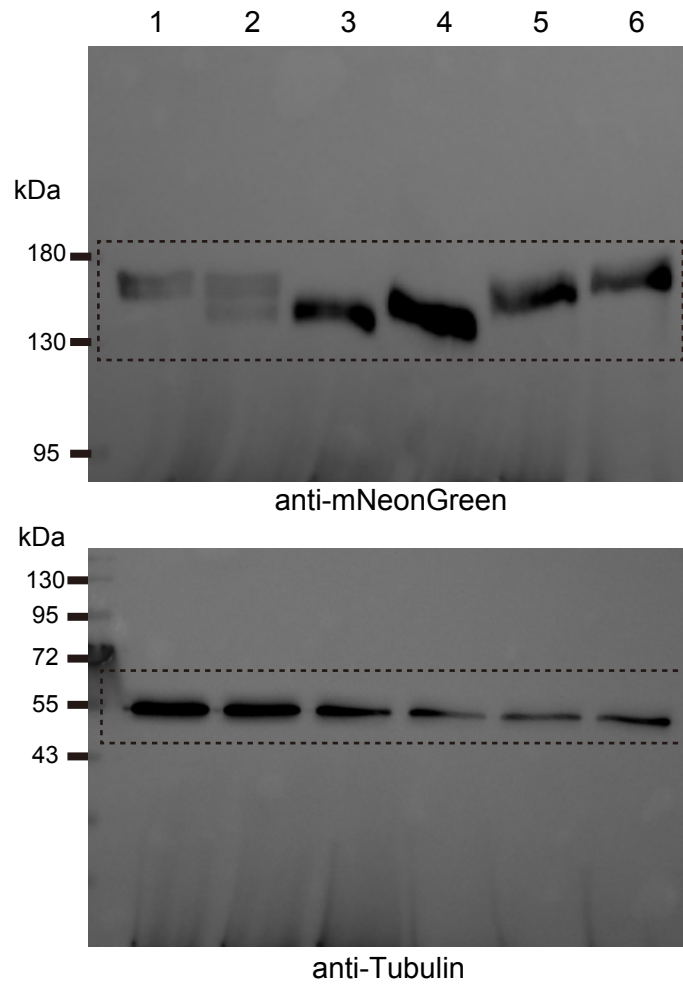

1. Rga3-2mNeonGreen h+
  2. Rga3-2mNeonGreen h-
  3. Rga4-2mNeonGreen h+
  4. Rga4-2mNeonGreen h-
  5. Rga6-2mNeonGreen h+
  6. Rga6-2mNeonGreen h-
- vegetative cells**

## SourceDataF3B

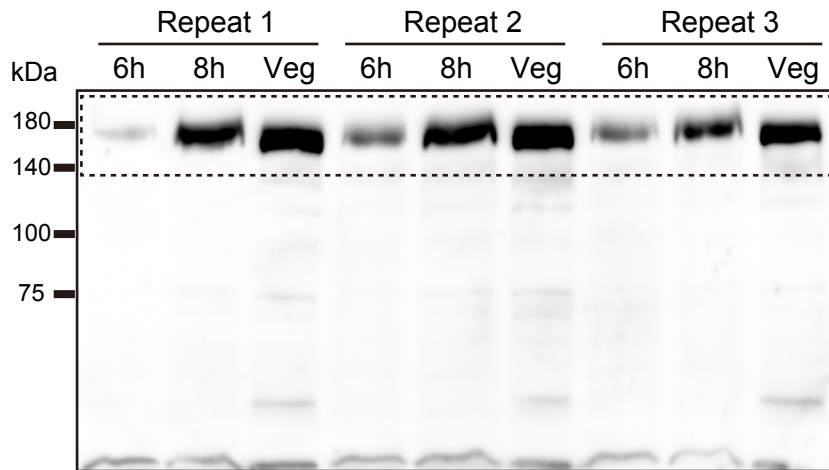

anti-mNeonGreen

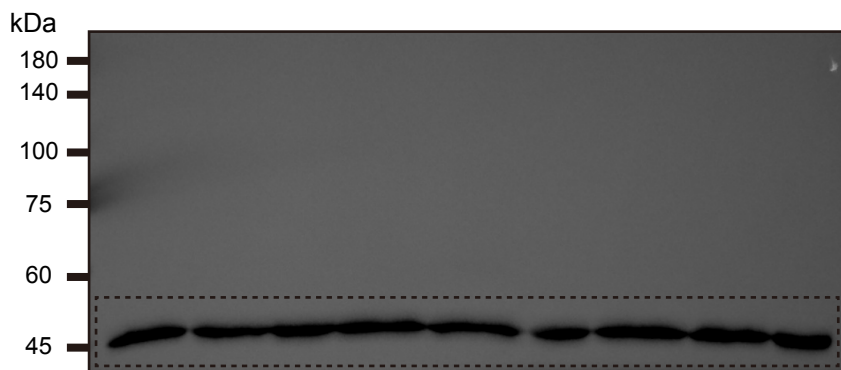

anti-Actin

### Rga6-2mNeonGreen

6h: 6 hours after germination

8h: 8 hours after germination

Veg: vegetative growth

## SourceDataF3C

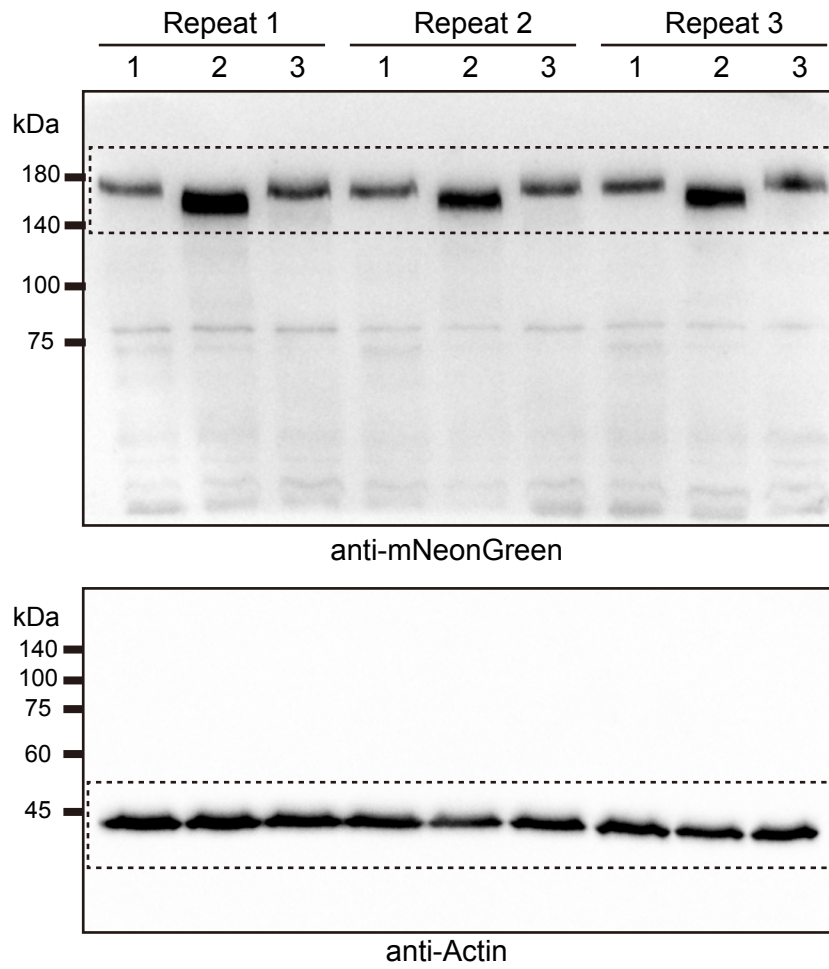

1. Rga3-2mNeonGreen
  2. Rga4-2mNeonGreen
  3. Rga6-2mNeonGreen
- Germinating cells  
(8 hours after germination)**
