# Supplementary material for: The Cdc42 GAP Rga6 promotes monopolar outgrowth of spores
Source: PubMed Central journal article supplement — J Cell Biol. 2022 Nov 10;222(1):e202202064. doi: 10.1083/jcb.202202064 (PMC9652770; doi:10.1083/jcb.202202064), 2022-11-10
Supplement: JCB_202202064_SourceDataF6.pdf [file JCB_202202064_SourceDataF6.pdf]

## SourceDataF6C

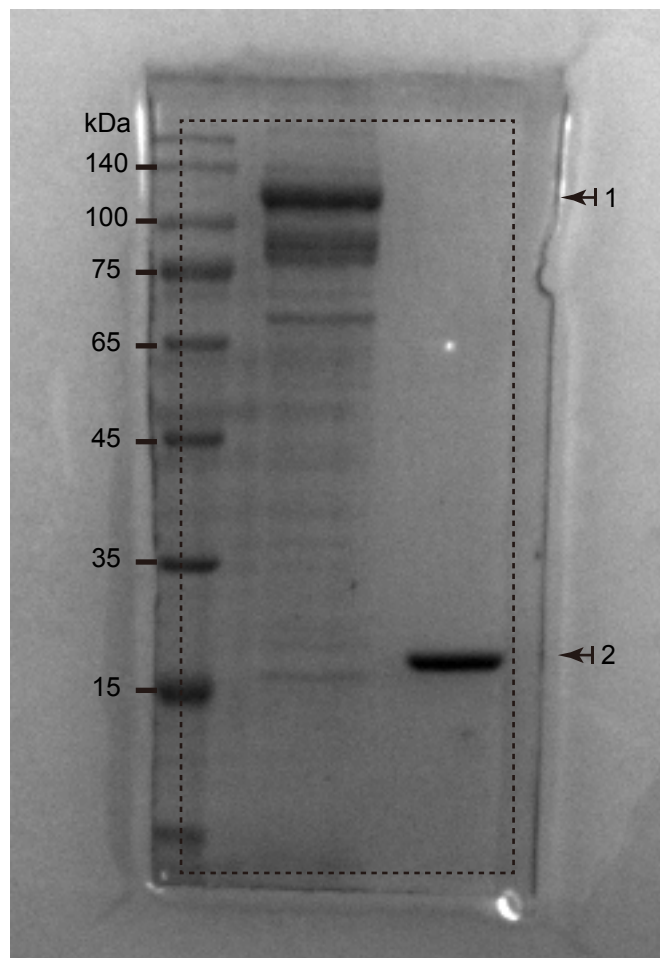

1. His-GFP-Rga6: 0.79  $\mu$ M
2. His-GFP: 3.5  $\mu$ M

## SourceDataF6H

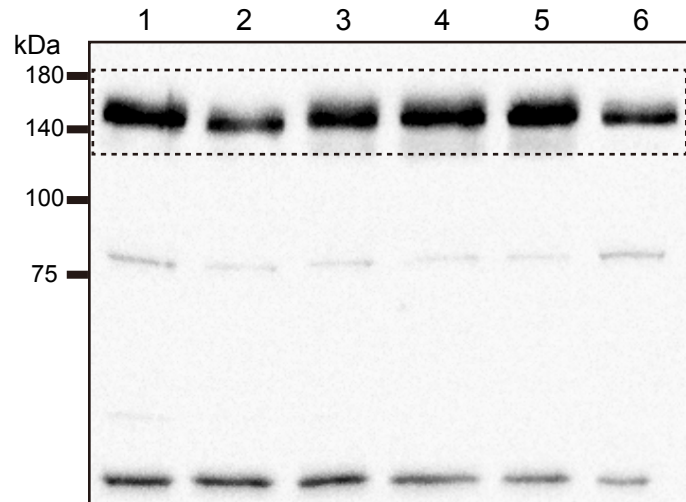

anti-tdTomato

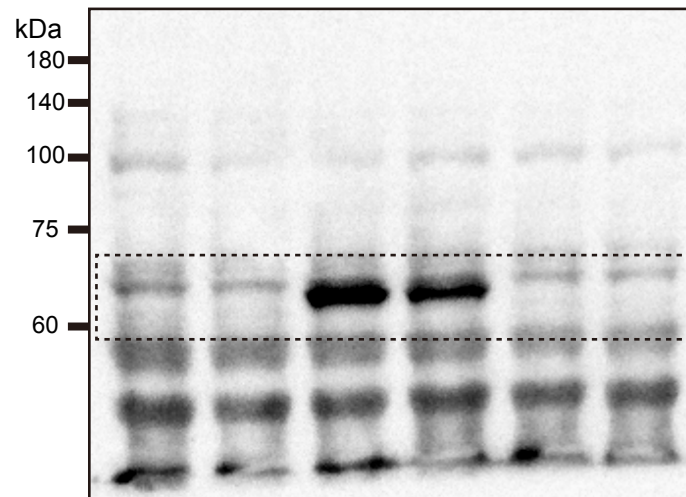

anti-GFP

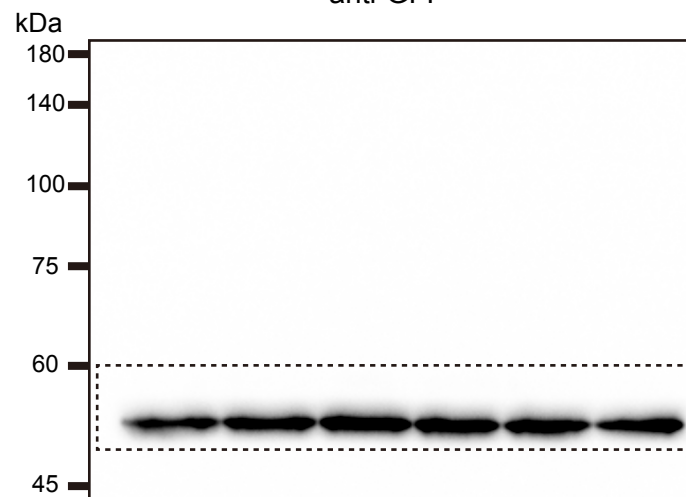

anti-Tubulin

1. WT Rga6-tdTomato h+
2. WT Rga6-tdTomato h-
3. WT *Pcam*-Opy1-GFP Rga6-tdTomato h+
4. WT *Pcam*-Opy1-GFP Rga6-tdTomato h-
5. *opy1* $\Delta$  Rga6-tdTomato h+
6. *opy1* $\Delta$  Rga6-tdTomato h-
