# Supplementary material for: The Cdc42 GAP Rga6 promotes monopolar outgrowth of spores
Source: PubMed Central journal article supplement — J Cell Biol. 2022 Nov 10;222(1):e202202064. doi: 10.1083/jcb.202202064 (PMC9652770; doi:10.1083/jcb.202202064), 2022-11-10
Supplement: JCB_202202064_SourceDataFS2.pdf [file JCB_202202064_SourceDataFS2.pdf]

## SourceDataFS2C

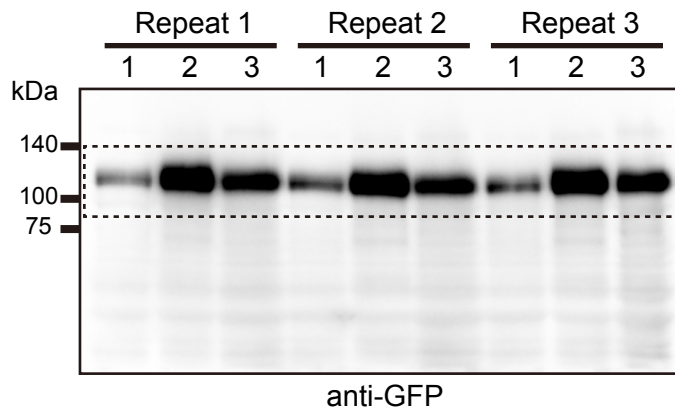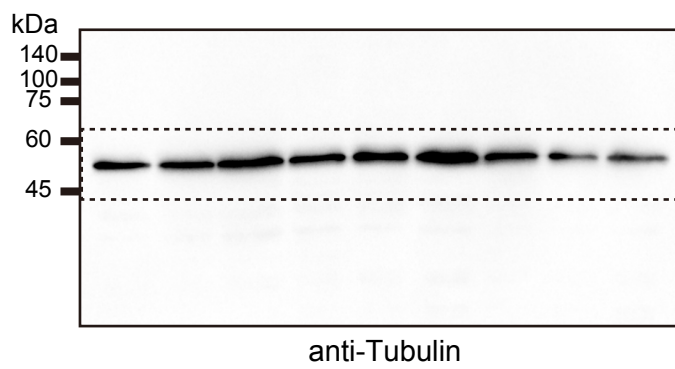

- 1) *rga6*Δ *rga6*<sup>Promoter</sup>-Rga6-GFP
- 2) WT *cam1*<sup>Promoter</sup>-Rga6-GFP h+
- 3) WT *cam1*<sup>Promoter</sup>-Rga6-GFP h-
