# Supplementary material for: The Cdc42 GAP Rga6 promotes monopolar outgrowth of spores
Source: PubMed Central journal article supplement — J Cell Biol. 2022 Nov 10;222(1):e202202064. doi: 10.1083/jcb.202202064 (PMC9652770; doi:10.1083/jcb.202202064), 2022-11-10
Supplement: JCB_202202064_SourceDataFS4.pdf [file JCB_202202064_SourceDataFS4.pdf]

## SourceDataFS4A

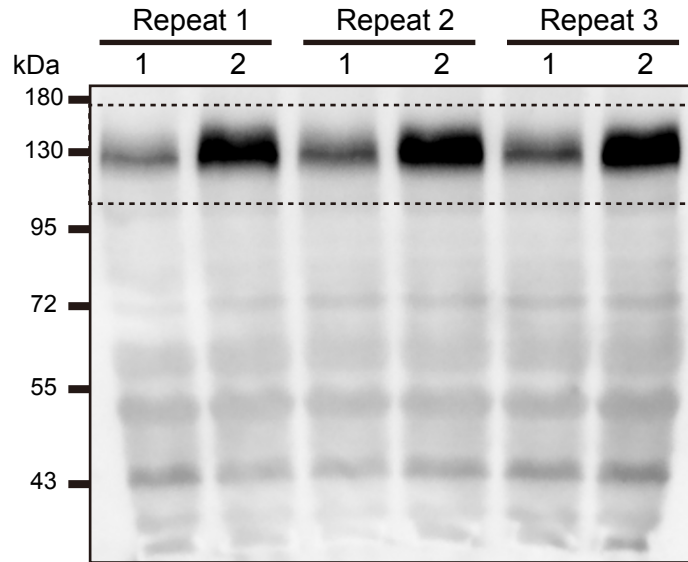

anti-GFP

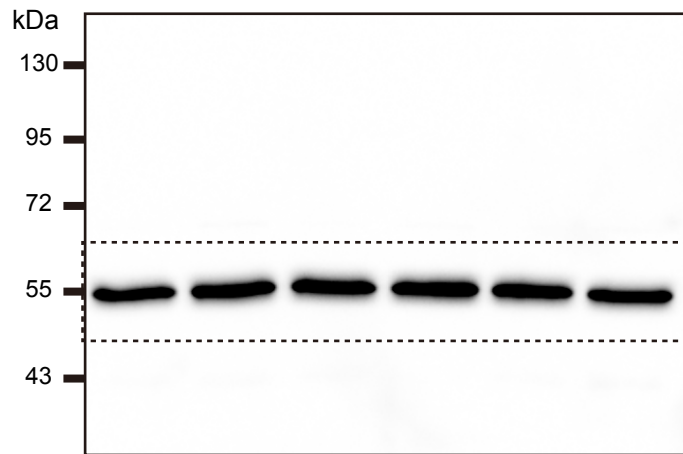

anti-Tubulin

1. *rga6Δ rga6P*-Rga6-GFP
2. *rga6Δ ase1P*-Rga6-GFP

## SourceDataFS4B

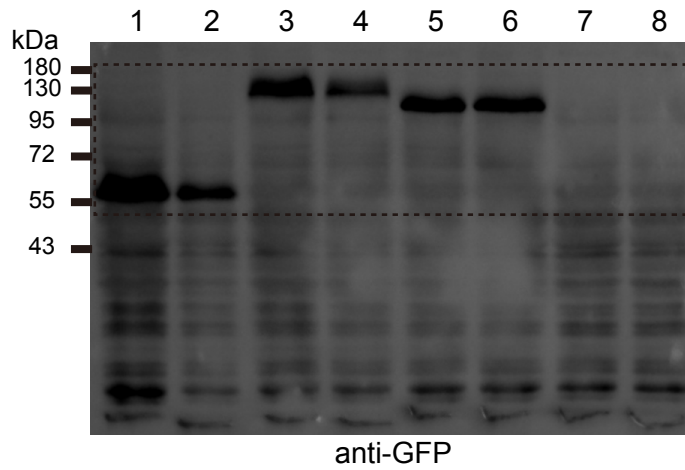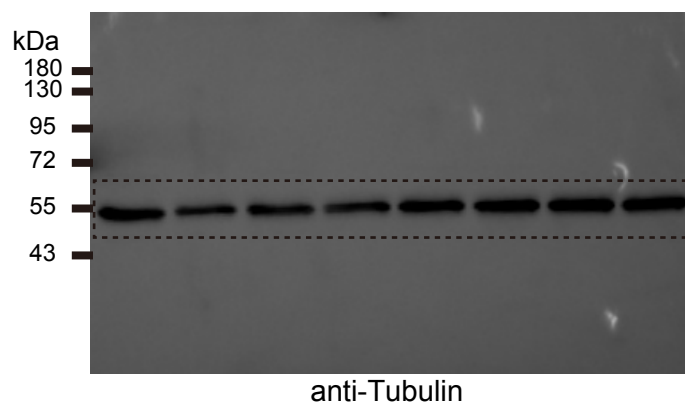

1. *rga6Δ ase1P-Rga6-ΔN-GFP* h+
2. *rga6Δ ase1P-Rga6-ΔN-GFP* h-
3. *rga6Δ ase1P-Rga6-FL-GFP* h+
4. *rga6Δ ase1P-Rga6-FL-GFP* h-
5. *rga6Δ ase1P-Rga6-ΔPBR-GFP* h+
6. *rga6Δ ase1P-Rga6-ΔPBR-GFP* h-
7. *rga6Δ* h+
8. *rga6Δ* h-

## SourceDataFS4C

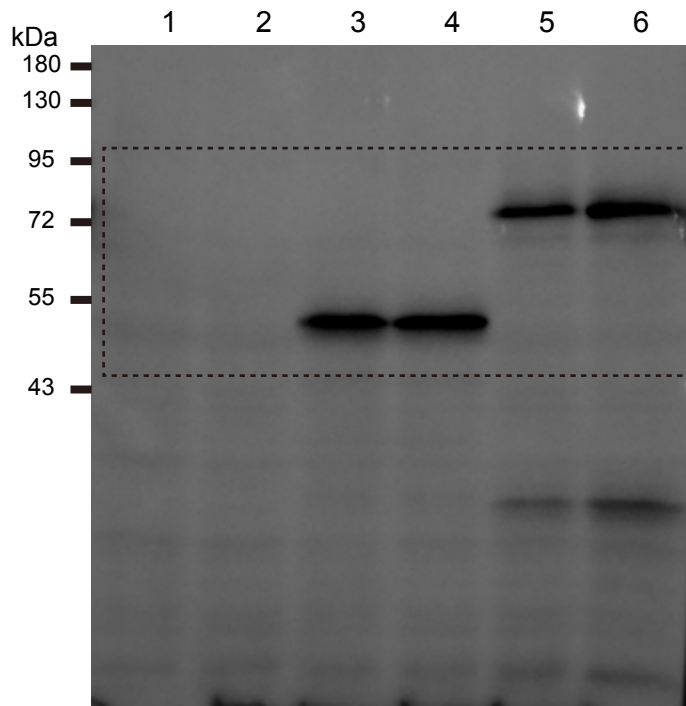

anti-GFP

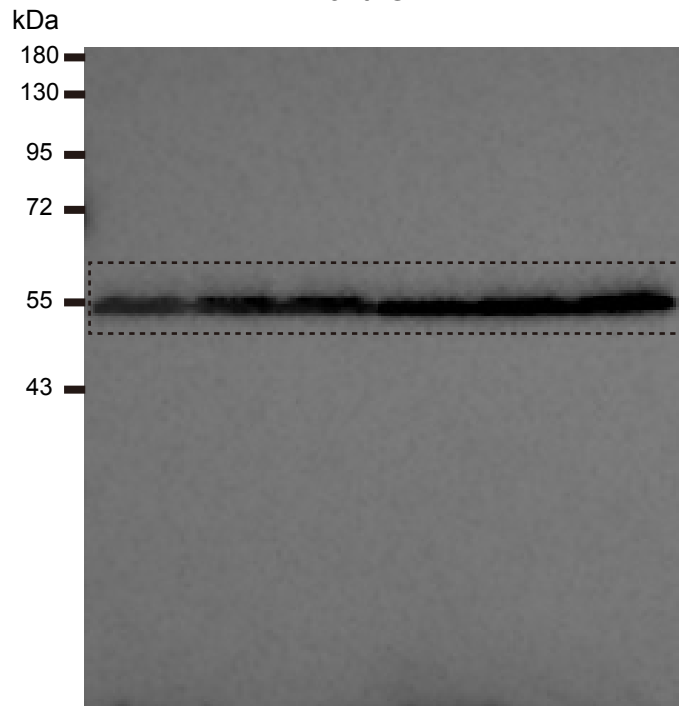

anti-Tubulin

1. *rga6* $\Delta$  h+
2. *rga6* $\Delta$  h-
3. *rga6* $\Delta$  *ase1P*-Rga3(GAP)-GFP h+
4. *rga6* $\Delta$  *ase1P*-Rga3(GAP)-GFP h-
5. *rga6* $\Delta$  *ase1P*-Rga3(GAP)Rga6(PBR)-GFP h+
6. *rga6* $\Delta$  *ase1P*-Rga3(GAP)Rga6(PBR)-GFP h-

## SourceDataFS4D

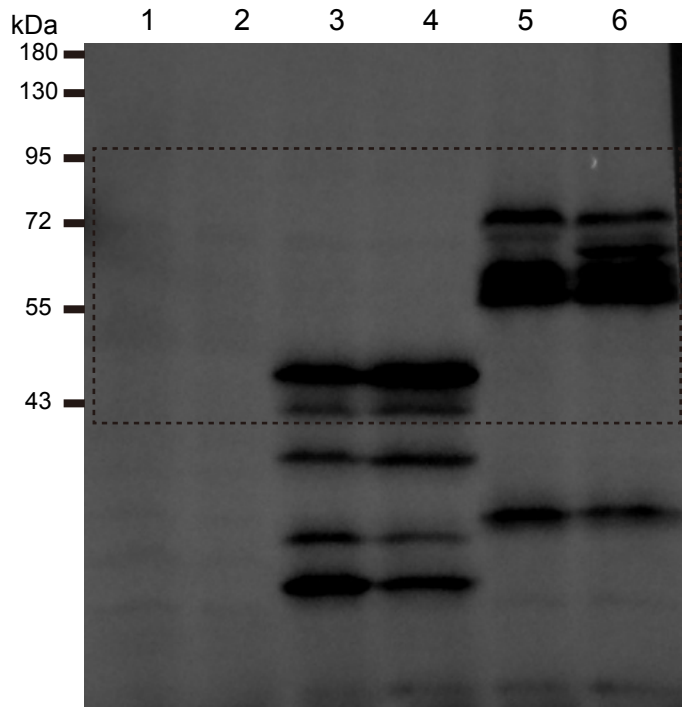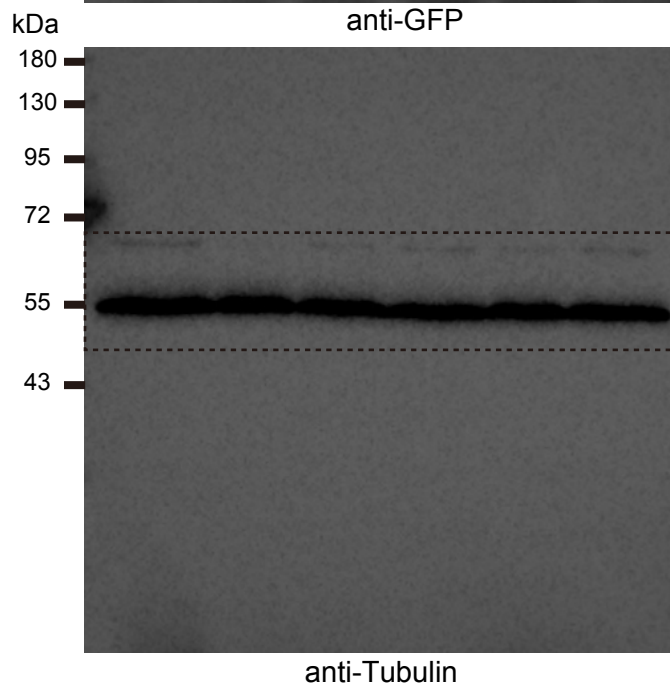

1. *rga6* $\Delta$  h<sup>+</sup>
2. *rga6* $\Delta$  h<sup>-</sup>
3. *rga6* $\Delta$  *ase1P-Rga4(GAP)*-GFP h<sup>+</sup>
4. *rga6* $\Delta$  *ase1P-Rga4(GAP)*-GFP h<sup>-</sup>
5. *rga6* $\Delta$  *ase1P-Rga4(GAP)Rga6(PBR)*-GFP h<sup>+</sup>
6. *rga6* $\Delta$  *ase1P-Rga4(GAP)Rga6(PBR)*-GFP h<sup>-</sup>
