# Supplementary material for: The Cdc42 GAP Rga6 promotes monopolar outgrowth of spores
Source: PubMed Central journal article supplement — J Cell Biol. 2022 Nov 10;222(1):e202202064. doi: 10.1083/jcb.202202064 (PMC9652770; doi:10.1083/jcb.202202064), 2022-11-10
Supplement: JCB_202202064_SourceDataFS5.pdf [file JCB_202202064_SourceDataFS5.pdf]

## SourceDataFS5A

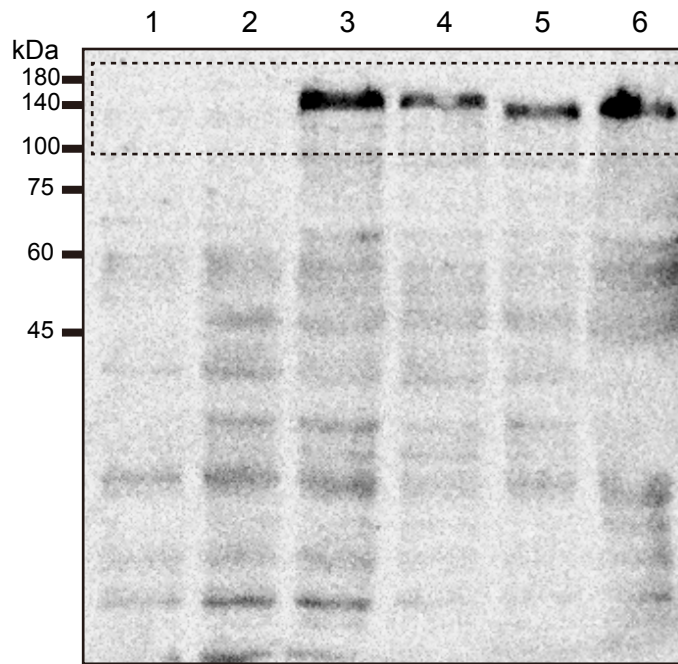

anti-GFP

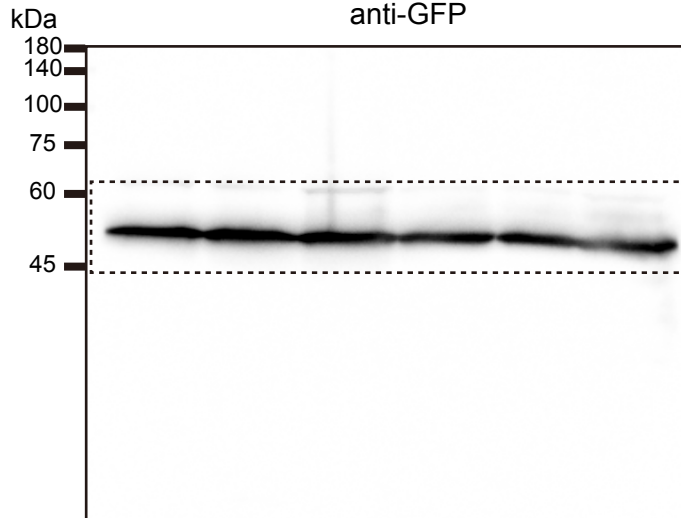

anti-Tubulin

1. *rga6* $\Delta$  h+
2. *rga6* $\Delta$  h-
3. *rga6* $\Delta$  *ase1P*-Rga3-GFP h+
4. *rga6* $\Delta$  *ase1P*-Rga3-GFP h-
5. *rga6* $\Delta$  *ase1P*-Rga4-GFP h+
6. *rga6* $\Delta$  *ase1P*-Rga4-GFP h-
